# Supplementary material for: Emissions Reduction Strategies for the Orange and Cherry Industries in New South Wales
Source: MDPI journal article supplement (doi:10.3390/foods12183328), 2023-09-05
Supplement: s1 [file s1]

# Emissions Reduction Strategies for the Orange and Cherry Industries in New South Wales

Aaron T. Simmons <sup>1,2,\*</sup>, Marja Simpson <sup>3</sup>, Paul-Antoine Bontinck <sup>4</sup>, John Golding <sup>5</sup>, Tim Grant <sup>4</sup>, Jess Fearnley <sup>3</sup> and Steven Falivene <sup>6</sup>

<sup>1</sup> NSW Department of Primary Industries, Muldoon St., Taree, NSW 2430, Australia

<sup>2</sup> School of Business, University of New England, Elm Ave, Armidale, NSW 2350, Australia

<sup>3</sup> NSW Department of Primary Industries, Orange Agricultural Institute, Orange, NSW 2800, Australia; marja.simpson@dpi.nsw.gov.au (M.S.); jessica.fearnley@dpi.nsw.gov.au (J.F.)

<sup>4</sup> Lifecycles, 2/398 Smith Street, Collingwood, VIC 3066, Australia; paul-antoine@lifecycles.com.au (P.-A.B.); tim@lifecycles.com.au (T.G.)

<sup>5</sup> NSW Department of Primary Industries, Locked Bag 26, Gosford, NSW 2250, Australia; john.golding@dpi.nsw.gov.au

<sup>6</sup> NSW Department of Primary Industries, P.O. Box 62, Dareton, NSW 2717, Australia; steven.falivene@dpi.nsw.gov.au

\* Correspondence: aaron.simmons@dpi.nsw.gov.au

Table S1: Average yield, orchard activities and inputs for a cherry orchard in Orange NSW

|                                        |              | Year<br>1 | Years 2 and<br>3 | Years 4 and<br>5 | Years 6+   |
|----------------------------------------|--------------|-----------|------------------|------------------|------------|
| <b>Cherry orchard activities</b>       | <b>unit</b>  |           |                  |                  |            |
| average yield                          | t/ha         | 0         | 1.5              | 8.5              | 15         |
| electricity for pumping for irrigation | ML/ha        | 0         | 2.9              | 2.9              | 2.9        |
| inter-row cultivation                  | times/ha     | 0         | 2                | 2                | 2          |
| inter-row tractor operation            | times/ha     | 0         | 4                | 4                | 4          |
| air blast spraying                     | times/ha     | 0         | 11               | 11               | 11         |
| boom spraying                          | times/ha     | 0         | 4                | 4                | 4          |
| ammonium nitrate                       | kg/ha        | 0         | 8                | 8                | 8          |
| calcium ammonium nitrate               | kg/ha        | 0         | 266              | 280              | 525        |
| diammonium phosphate                   | kg/ha        | 0         | 2.7              | 2.7              | 2.7        |
| potassium nitrate                      | kg/ha        | 0         | 177              | 187              | 350        |
| monoammonium phosphate                 | kg/ha        | 0         | 13.5             | 13.5             | 13.5       |
| benomy                                 | <b>kg/ha</b> | <b>0</b>  | <b>0.5</b>       | <b>0.5</b>       | <b>0.5</b> |
| copper oxychloride                     | kg/ha        | 0         | 1.925            | 1.925            | 1.925      |
| gibberelic acid                        | kg/ha        | 0         | 0.28737          | 0.28737          | 0.28737    |
| tau-fluvalinate                        | kg/ha        | 0         | 0.082            | 0.082            | 0.082      |
| mancozeb                               | kg/ha        | 0         | 2.25             | 2.25             | 2.25       |
| ziram                                  | kg/ha        | 0         | 2.28             | 2.28             | 2.28       |
| horticultural oil                      | kg/ha        | 0         | 25.8             | 25.8             | 25.8       |
| undertree irrigation system            | times/ha     | 1         | 0                | 0                | 0          |
| levelling                              | times/ha     | 1         | 0                | 0                | 0          |
| offset disc harrowing                  | times/ha     | 1         | 0                | 0                | 0          |
| tree removal                           | times/ha     | 1         | 0                | 0                | 0          |
| raking tree residues                   | times/ha     | 2         | 0                | 0                | 0          |
| row mounding                           | times/ha     | 1         | 0                | 0                | 0          |
| seedling transplanting                 | times/ha     | 1         | 0                | 0                | 0          |
| soil cultivation                       | times/ha     | 1         | 0                | 0                | 0          |
| soil ripping                           | times/ha     | 1         | 0                | 0                | 0          |
| stump pulling                          | times/ha     | 1         | 0                | 0                | 0          |
| transport of inputs                    | kg/km/ha     | 0         | 100 000          | 105 000          | 187 000    |

Table S2: Average yield, orchard activities and inputs for an orange orchard in the Sunraysia region of

NSW

| <b>orange orchard activities</b>       | <b>unit</b> | <b>Year 1</b> | <b>Year 2 to 4</b> | <b>Year 5 to 7</b> | <b>Year 8 to 10</b> | <b>Years 10+</b> |
|----------------------------------------|-------------|---------------|--------------------|--------------------|---------------------|------------------|
| average yield                          | t/ha        | 0             | 1                  | 8                  | 25                  | 40               |
| electricity for pumping for irrigation | ML/ha       | 0             | 4.67               | 6.67               | 9                   | 10               |
| air blast spraying                     | times/ha    | 0             | 10                 | 6                  | 2                   | 5                |
| fertiliser side dressing               | times/ha    | 0             | 0                  | 0                  | 10                  | 2                |
| fertiliser spreading                   | times/ha    | 0             | 3                  | 10                 | 2                   | 10               |
| boom spraying                          | times/ha    | 0             | 3.3                | 4.3                | 4                   | 5.3              |
| ammonium nitrate                       | kg/ha       | 0             | 24.2               | 24.2               | 43.5                | 38.5             |
| ammonium sulphate                      | kg/ha       | 0             | 0.606              | 0.757              | 0.881               | 0.549            |
| calcium ammonium nitrate               | kg/ha       | 0             | 14                 | 18.7               | 18.8                | 9.5              |
| diammonium phosphate                   | kg/ha       | 0             | 0.156              | 0.156              | 0.28                | 0.248            |
| double superphosphate                  | kg/ha       | 0             | 0.884              | 1.13               | 1.25                | 0.734            |
| monoammonium phosphate                 | kg/ha       | 0             | 25.2               | 25.2               | 75.3                | 30.2             |
| potassium chloride                     | kg/ha       | 0             | 0.155              | 0.155              | 0.279               | 0.248            |
| potassium nitrate                      | kg/ha       | 0             | 28.2               | 30.2               | 150                 | 85.3             |
| carfentrazone-ethyl                    | kg/ha       | 0             | 0.0012             | 0.0012             | 0.0012              | 0.0012           |
| chlorpyrifos                           | kg/ha       | 0             | 0.405              | 0.405              | 0.96                | 1.92             |
| diquat                                 | kg/ha       | 0             | 0.0012             | 0.0012             | 0.345               | 0.345            |
| gluufosinate ammonium                  | kg/ha       | 0             | 0                  | 0                  | 0.03                | 0.03             |
| glyphosate                             | kg/ha       | 0             | 1.4                | 1.4                | 1.4                 | 1.4              |
| haloxyfop                              | kg/ha       | 0             | 0.416              | 0.416              | 0.416               | 0.416            |
| imidacloprid                           | kg/ha       | 0             | 0.416              | 0.416              | 1.02                | 1.02             |
| methiocarb                             | kg/ha       | 0             | 0.405              | 0.405              | 7.5                 | 7.5              |
| paraquat                               | kg/ha       | 0             | 0.405              | 0.405              | 0.405               | 0.405            |
| potassium sulphate                     | kg/ha       | 0             | 0.155              | 0.155              | 0.279               | 0.248            |
| single superphosphate                  | kg/ha       | 0             | 0.302              | 0.351              | 0.475               | 0.346            |
| spinetoram                             | kg/ha       | 0             | 0.416              | 0.416              | 3.85                | 5.8              |
| triple superphosphate                  | kg/ha       | 0             | 0.199              | 0.214              | 0.338               | 0.277            |
| urea                                   | kg/ha       | 0             | 8.96               | 8.96               | 9.08                | 9.05             |
| cultivating                            | times/ha    | 1             | 0                  | 0                  | 0                   | 0                |
| levelling - soil cultivation           | times/ha    | 1             | 0                  | 0                  | 0                   | 0                |
| offset disc harrowing                  | times/ha    | 1             | 0                  | 0                  | 0                   | 0                |
| orchard raking                         | times/ha    | 2             | 0                  | 0                  | 0                   | 0                |
| ripping - soil cultivation             | times/ha    | 1             | 0                  | 0                  | 0                   | 0                |
| seedling transplanting                 | times/ha    | 1             | 0                  | 0                  | 0                   | 0                |
| stump pulling                          | times/ha    | 1             | 0                  | 0                  | 0                   | 0                |
| tree removal                           | times/ha    | 1             | 0                  | 0                  | 0                   | 0                |
| undertree irrigation system            | times/ha    | 1             | 0                  | 0                  | 0                   | 0                |
| transport, truck, 28t                  | kg/km/ha    | 0             | 52300              | 58600              | 155000              | 93700            |
